# Supplementary material for: A Simple Validated Method for the Estimation of Pepsin Activity in Microtiter Array for the INFOGEST Protocol
Source: Foods. 2023 Oct 20;12(20):3851. doi: 10.3390/foods12203851 (PMC10606326; doi:10.3390/foods12203851)
Supplement: Supplementary file 1 [file foods-12-03851-s001.zip › Supplementary material S2 - Excel for calculation of pepsin activity (with example data).xlsx]

## Sheet: L-Tyr Calibration curve
	S2: Excel for calculation of pepsin activity
	L-Tyr standard concentration	500	ug/mL
	L-TYROSINE CALIBRATION CURVE
	L-Tyr aliquot (µL)	L-Tyr (mM)	10 mM HCl (µL)	Absorbance at 760 nm
	0	0	1000	0.044
	10	0.0275938	990	0.084
	20	0.0551876	980	0.125
	50	0.137969	950	0.238
	80	0.220751	920	0.342
	110	0.303532	890	0.434
		Slope	1.29166
		Y-Intercept	0.050779
		R2	0.997842

## Sheet: Pepsin activity
	ESTIMATION OF PEPSIN (EC 3.4.23.1) ACTIVITY FOR THE INFOGEST PROTOCOL BY THE FOLIN-CIOCALTEU METHOD
	Pepsin solutions (µg/mL)	Abs L-Tyr Blank	Abs L-Tyr Test	Δ L Tyr (mM)		Activity (Units/mg)
	5	0.188	0.212	0.0185808		1902.67
	10	0.185	0.247	0.0480004		2457.62
	15	0.181	0.27	0.0689038		2351.92
	20	0.182	0.303	0.0936782		2398.16
	25	0.18	0.306	0.0975492		1997.81
	30	0.187	0.332	0.112259		1915.89
				Average		2170.68
				SD		258.287
				R2		0.953039
	For more guidance, follow the suppplementary data
	Δt (min)	10
	Pepsin aliquot Df	16
	Pepsin ug to mg	1000
	Pepsin in well Df	4
	Factor to INFOGEST	0.0125
