# Supplementary material for: A Simple Validated Method for the Estimation of Pepsin Activity in Microtiter Array for the INFOGEST Protocol
Source: Foods. 2023 Oct 20;12(20):3851. doi: 10.3390/foods12203851 (PMC10606326; doi:10.3390/foods12203851)
Supplement: Supplementary file 1 [file foods-12-03851-s001.zip › Supplementary material S3 - Data involved in the research article.xlsx]

## Sheet: L-Tyrosine curve (280 nm)
UV-Method (280 nm)
Concentration levels (mM)	Replicates (AU)			Mean
0	0.018	0.015	0.016	0.0163333
0.110375	0.138	0.142	0.142	0.140667
0.220751	0.265	0.27	0.27	0.268333
0.331126	0.394	0.401	0.404	0.399667
0.441501	0.533	0.53	0.534	0.532333
0.662252	0.803	0.8	0.813	0.805333
0.883002	1.045	1.053	1.053	1.05033
1.10375	1.312	1.306	1.305	1.30767
	Full data linear regression				0 - 0.44 linear regression
	Best-fit values				Best-fit values
	Slope	1.176			Slope	1.168
	Y-intercept	0.01319			Y-intercept	0.0135
	X-intercept	-0.01121			X-intercept	-0.01155
	1/slope	0.85			1/slope	0.8559
	Std. Error				Std. Error					mM	AU
	Slope	0.003803			Slope	0.006072		LOD = 3.3 Sy/x /slope		0.0103831	0.0256275
	Y-intercept	0.002251			Y-intercept	0.001642		LOQ = 10 Sy/x /slope		0.031464	0.05025
	95% Confidence Intervals				95% Confidence Intervals
	Slope	1,169 to 1,184			Slope	1,155 to 1,181
	Y-intercept	0,008518 to 0,01785			Y-intercept	0,009950 to 0,01705
	X-intercept	-0,01526 to -0,007202			X-intercept	-0,01473 to -0,008439
	Goodness of Fit				Goodness of Fit
	R squared	0.9998			R squared	0.9996
	Sy.x	0.006723			Sy.x	0.003675
	Is slope significantly non-zero?				Is slope significantly non-zero?
	F	95715			F	37028
	DFn, DFd	1, 22			DFn, DFd	1, 13
	P value	<0,0001			P value	<0,0001
	Deviation from zero?	Significant			Deviation from zero?	Significant
	Equation	Y = 1,176*X + 0,01319			Equation	Y = 1,168*X + 0,01350
	Data				Data
	Number of X values	24			Number of X values	15
	Maximum number of Y replicates	3			Maximum number of Y replicates	3
	Total number of values	24			Total number of values	15
	Number of missing values	0			Number of missing values	0

## Sheet: L-Tyrosine curve (760 nm)
VIS-Method (760 nm)
Concentration levels (mM)	Final concentration (fD=4)	Replicates (AU)			Mean
0	0	0.043	0.045	0.044	0.044
0.0141943	0.00354857	0.067	0.063	0.064	0.0646667
0.0283885	0.00709713	0.084	0.085	0.08	0.083
0.0425828	0.0106457	0.104	0.102	0.103	0.103
0.056777	0.0141943	0.125	0.122	0.125	0.124
0.141943	0.0354857	0.238	0.237	0.244	0.239667
0.227108	0.056777	0.342	0.336	0.347	0.341667
0.312274	0.0780684	0.434	0.444	0.448	0.442
		Full data linear regression				0 - 0.014 linear regression
		Best-fit values				Best-fit values
		Slope	5.117			Slope	5.587
		Y-intercept	0.04861			Y-intercept	0.04418
		X-intercept	-0.009499			X-intercept	-0.007908
		1/slope	0.1954			1/slope	0.179
		Std. Error				Std. Error					mM	AU
		Slope	0.04428			Slope	0.08875		LOD = 3.3 Sy/x /slope		0.00101947	0.053
		Y-intercept	0.001639			Y-intercept	0.0007703		LOQ = 10 Sy/x /slope		0.00308931	0.0644273
		95% Confidence Intervals				95% Confidence Intervals
		Slope	5,025 to 5,209			Slope	5,395 to 5,778
		Y-intercept	0,04521 to 0,05201			Y-intercept	0,04252 to 0,04584
		X-intercept	-0,01030 to -0,008717			X-intercept	-0,008469 to -0,007383
		Goodness of Fit				Goodness of Fit
		R squared	0.9984			R squared	0.9967
		Sy.x	0.005774			Sy.x	0.001726
		Is slope significantly non-zero?				Is slope significantly non-zero?
		F	13356			F	3962
		DFn, DFd	1, 22			DFn, DFd	1, 13
		P value	<0,0001			P value	<0,0001
		Deviation from zero?	Significant			Deviation from zero?	Significant
		Equation	Y = 5,117*X + 0,04861			Equation	Y = 5,587*X + 0,04418
		Data				Data
		Number of X values	24			Number of X values	15
		Maximum number of Y replicates	3			Maximum number of Y replicates	3
		Total number of values	24			Total number of values	15
		Number of missing values	0			Number of missing values	0

## Sheet: Pepsin activity INFOGEST protoc
Day	Pepsin concentration level (ug/mL)	A (Blank)	A (test)	Activity (units/mg)
1	5	0.282	0.369	1740
	10	0.273	0.468	1950
	15	0.28	0.589	2060
	20	0.274	0.734	2300
2	5	0.247	0.355	2160
	10	0.271	0.443	1720
	15	0.259	0.552	1953.33
	20	0.275	0.636	1805
	25	0.257	0.735	1912
	30	0.26	0.859	1996.67
3	5	0.299	0.369	1400
	10	0.287	0.478	1910
	15	0.279	0.595	2106.67
	20	0.283	0.7	2085
	25	0.279	0.81	2124
	30	0.299	0.939	2133.33
4	5	0.28	0.375	1900
	10	0.28	0.457	1770
	15	0.277	0.545	1786.67
	20	0.266	0.654	1940
	25	0.272	0.791	2076
	30	0.268	0.917	2163.33
5	5	0.267	0.352	1700
	10	0.272	0.45	1780
	15	0.27	0.542	1813.33
	20	0.278	0.651	1865
	25	0.262	0.745	1932
	30	0.27	0.862	1973.33
			CV	0.0967402
			N°	28
	DAY	ACTIVITY MEAN
	1	2012.5
	2	1924.5
	3	1925.13
	4	1939.33
	5	1843.94
	Interday mean	1929.08
	SD	59.8929
	CV	0.0310474
	IC	57.1055

## Sheet: Pepsin activity VIS method
Day	Pepsin concentration level (ug/mL)	A (Blank)	A (test)	mM (Blank)	mM (test)	Δ mM (test-blank)	Pepsin in tube (mg/mL)	umol/mg*10 min	umol/mg (IU)	units/mg
1	5	0.188	0.212	0.108984	0.127734	0.01875	7.8125e-05	240	24	1920
	10	0.185	0.247	0.106641	0.155078	0.0484375	0.00015625	310	31	2480
	15	0.181	0.27	0.103516	0.173047	0.0695313	0.000234375	296.667	29.6667	2373.33
	20	0.182	0.303	0.104297	0.198828	0.0945312	0.0003125	302.5	30.25	2420
2	5	0.18	0.206	0.102734	0.123047	0.0203125	7.8125e-05	260	26	2080
	10	0.175	0.223	0.0988281	0.136328	0.0375	0.00015625	240	24	1920
	15	0.178	0.253	0.101172	0.159766	0.0585938	0.000234375	250	25	2000
	20	0.183	0.282	0.105078	0.182422	0.0773437	0.0003125	247.5	24.75	1980
	25	0.188	0.308	0.108984	0.202734	0.09375	0.000390625	240	24	1920
3	10	0.2	0.244	0.118359	0.152734	0.034375	0.00015625	220	22	1760
	15	0.18	0.257	0.102734	0.162891	0.0601563	0.000234375	256.667	25.6667	2053.33
	20	0.181	0.29	0.103516	0.188672	0.0851562	0.0003125	272.5	27.25	2180
	25	0.177	0.324	0.100391	0.215234	0.114844	0.000390625	294	29.4	2352
	30	0.182	0.354	0.104297	0.238672	0.134375	0.00046875	286.667	28.6667	2293.33
4	5	0.17	0.188	0.0949219	0.108984	0.0140625	7.8125e-05	180	18	1440
	10	0.173	0.226	0.0972656	0.138672	0.0414063	0.00015625	265	26.5	2120
	15	0.179	0.252	0.101953	0.158984	0.0570313	0.000234375	243.333	24.3333	1946.67
	20	0.176	0.27	0.0996094	0.173047	0.0734375	0.0003125	235	23.5	1880
	25	0.177	0.303	0.100391	0.198828	0.0984375	0.000390625	252	25.2	2016
	30	0.18	0.34	0.102734	0.227734	0.125	0.00046875	266.667	26.6667	2133.33
5	5	0.156	0.178	0.0839844	0.101172	0.0171875	7.8125e-05	220	22	1760
	10	0.158	0.209	0.0855469	0.125391	0.0398437	0.00015625	255	25.5	2040
	15	0.16	0.227	0.0871094	0.139453	0.0523437	0.000234375	223.333	22.3333	1786.67
	20	0.157	0.257	0.0847656	0.162891	0.078125	0.0003125	250	25	2000
	30	0.15	0.294	0.0792969	0.191797	0.1125	0.00046875	240	24	1920
									CV	0.115705
									N°	25
	DAY	ACTIVITY MEAN
	1	2298.33
	2	1980
	3	2127.73
	4	1922.67
	5	1901.33
	Interday mean	2046.01
	SD	166.469
	CV	0.0813627
	IC	158.722
